# Supplementary material for: Soft seed-mediated dimensional control of metal–organic framework nanocrystals through oil-in-water microemulsions
Source: Royal Society of Chemistry journal article supplement (doi:10.1039/d3qi01567j), 2023-01-01
Supplement: d3qi01567j1.pdf [file d3qi01567j1.pdf]

## Electronic Supplementary Information

### Soft seed-mediated dimensional control of metal–organic framework nanocrystals through oil-in-water microemulsion

Jaedeok Lee,<sup>‡a</sup> Suhyeon Park,<sup>‡a</sup> Seojeong Woo,<sup>a</sup> Cheongwon Bae,<sup>a</sup> Yuri Jeon,<sup>a</sup> Mingyu Gu,<sup>a</sup> Jeongeon Kim,<sup>a</sup> Yeram Kim,<sup>a</sup> Sang Yong Nam,<sup>b</sup> Jong Hwa Jung<sup>a</sup> and Juyeong Kim<sup>\*a</sup>

<sup>a</sup>Department of Chemistry and Research Institute of Natural Sciences, Gyeongsang National University, Jinju 52828, South Korea

<sup>b</sup>Department of Materials Engineering and Convergence Technology, Gyeongsang National University, Jinju 52828, South Korea

<sup>‡</sup>These authors contributed equally to this work.

<sup>\*</sup>Corresponding author: Juyeong Kim, Email: [chris@gnu.ac.kr](mailto:chris@gnu.ac.kr)

Materials and Methods

Figures S1–S20

Tables S1–S5

Movies S1–S3

References

## **Materials and Methods**

### **Section 1. Chemicals**

Zinc nitrate hexahydrate (98%,  $\text{Zn}(\text{NO}_3)_2 \cdot 6\text{H}_2\text{O}$ , Sigma-Aldrich), cobalt nitrate hexahydrate (99.999%,  $\text{Co}(\text{NO}_3)_2 \cdot 6\text{H}_2\text{O}$ , Alfa Aesar), 2-methylimidazole (99%,  $\text{C}_4\text{H}_6\text{N}_2$ , Sigma-Aldrich), o-xylene (98%,  $\text{C}_8\text{H}_{10}$ , Samchun), benzene (98%,  $\text{C}_6\text{H}_6$ , Sigma-Aldrich), toluene (99.7%,  $\text{C}_7\text{H}_8$ , Daejung), ethylbenzene (99%,  $\text{C}_8\text{H}_{10}$ , Sigma-Aldrich), n-propylbenzene (98%,  $\text{C}_9\text{H}_{12}$ , Sigma-Aldrich), n-butylbenzene (99%,  $\text{C}_8\text{H}_{10}$ , Sigma-Aldrich), hydrochloric acid (35.0–37.0%, HCl, Daejung), nitric acid (60.0–62.0%,  $\text{HNO}_3$ , Daejung), methyl alcohol (99.5%,  $\text{CH}_3\text{OH}$ , Daejung), tannic acid (ACS reagent,  $\text{C}_7\text{H}_5\text{O}_4$ , Sigma-Aldrich), malononitrile (99%,  $\text{CH}_2(\text{CN})_2$ , Sigma-Aldrich), benzaldehyde (99.5%,  $\text{C}_7\text{H}_6\text{O}$ , Sigma-Aldrich), dodecane (99.5%,  $\text{C}_{12}\text{H}_{26}$ , TCI), methyl orange (85%,  $\text{C}_{14}\text{H}_{14}\text{N}_3\text{NaO}_3\text{S}$ , Sigma-Aldrich) and rhodamine B ( $\text{C}_{28}\text{H}_{31}\text{ClN}_2\text{O}_3$ , Sigma-Aldrich) were purchased and used without further purification. All glassware was cleaned by aqua regia (a mixture of HCl and  $\text{HNO}_3$ ), thoroughly rinsed with deionised water and dried before use. Deionised water (18.2  $\text{M}\Omega \cdot \text{cm}$  at 25 °C) purified by a Merck Millipore Direct Q3 UV Water Purification System was used for all solution preparation and washing. All reactions were performed at room temperature.

### **Section 2. Synthesis of ZIF crystals**

#### **2.1. ZIF-8 crystals with xylene-based microemulsion in different xylene volume ratios**

ZIF-8 crystals were synthesised according to a literature method with modification.<sup>1</sup> An aqueous solution of 24 mM  $\text{Zn}(\text{NO}_3)_2 \cdot 6\text{H}_2\text{O}$  (500  $\mu\text{L}$ ) was rapidly added to 1.32 M 2-methylimidazole (500  $\mu\text{L}$ ) while stirred at 500 rpm, followed by injecting xylene-based microemulsion solution (500  $\mu\text{L}$ ) in different xylene ratios. Note that the microemulsion solution was prepared by vigorously mixing a certain volume of xylene with 100 mL of deionised water in advance (0%: 0  $\mu\text{L}$ , 0.01%: 30  $\mu\text{L}$ , 0.10%: 300  $\mu\text{L}$  and 0.33%: 1000  $\mu\text{L}$ ). The reaction mixture was stirred for 5 min and left undisturbed for 3 h. ZIF-8 crystals were collected through centrifugation (6000 rpm, 10 min) and redispersed in methyl alcohol.

#### **2.2. ZIF-8 crystals with different oil phases**

ZIF-8 nanocrystals with different oil phases (benzene, toluene, ethylbenzene, propylbenzene and butylbenzene) were prepared by the same procedure as Section 2.1. The volume of each oil phase was fixed as 300  $\mu\text{L}$ .

### **2.3. ZIF-67 crystals with xylene-based microemulsion in different xylene volume ratios**

ZIF-67 crystals were synthesised according to a literature method with modification.<sup>2</sup> An aqueous solution of 0.164 mM  $\text{Co}(\text{NO}_3)_2 \cdot 6\text{H}_2\text{O}$  (600  $\mu\text{L}$ ) was rapidly added to 0.67 M 2-methylimidazole (4 mL) while stirred at 500 rpm, followed by injecting xylene-based microemulsion solution (460  $\mu\text{L}$ ) in different xylene ratios. Note that the microemulsion solution was prepared by vigorously mixing a certain volume of xylene with 100 mL of deionised water in advance (0%: 0  $\mu\text{L}$ , 0.03%: 100  $\mu\text{L}$  and 0.10%: 300  $\mu\text{L}$ ). The reaction mixture was stirred at 500 rpm for 5 h. ZIF-67 crystals were collected through centrifugation (6000 rpm, 10 min) and redispersed in methyl alcohol.

### **2.4. Hollow nanostructure**

Hollow nanostructure formation was performed according to a literature method with modification.<sup>3</sup> ZIF-67 nanocrystals prepared in Section 2.3 were first encapsulated by ZIF-8 shells as follows. Aqueous solutions of 30 mM 2-methylimidazole (2.5 mL) and 30 mM  $\text{Zn}(\text{NO}_3)_2 \cdot 6\text{H}_2\text{O}$  (2.5 mL) were added in sequence to ZIF-67 nanocrystal solution (200  $\mu\text{L}$ ). The mixture was left undisturbed for 1 h. The product (ZIF-67@ZIF-8) was collected after twice centrifugations (1000 rpm, 10 min) and redispersed in methyl alcohol (5 mL). Then, the core in ZIF-67@ZIF-8 nanocrystals were etched using tannic acid. An aqueous solution of tannic acid (200  $\mu\text{L}$ ) in different concentrations (0.6 mM for 0.03% and 3 mM for 0.1%) was added to ZIF-67@ZIF-8 nanocrystal solution. The mixture was left undisturbed for 10 min. The hollow nanostructure was collected after twice centrifugations (3000 rpm, 10 min) and redispersed in methyl alcohol.

## **Section 3. Application of ZIF crystals**

### **3.1. Knoevenagel condensation reaction**

ZIF-8 crystals were thoroughly dried at 100 °C for 6 h under vacuum. ZIF-8 crystals (0.0158 g) were mixed with benzaldehyde (200  $\mu\text{L}$ ), dodecane (200  $\mu\text{L}$ ) and toluene (400  $\mu\text{L}$ ), followed by ultrasonication for 2 min. The mixture was transferred into 1 mL of toluene with malononitrile (0.25 g) and stirred at 200 rpm. An aliquot (200  $\mu\text{L}$ ) was collected at 30 min, 1 h, 2 h, 4 h and 6 h and centrifuged to remove ZIF-8 crystals (10000 rpm, 1 min). The supernatant was measured using an Agilent 7890A gas chromatography (Agilent Technologies). Dodecane was used as an internal standard.

### **3.2. Dye adsorption**

ZIF-8 crystals were thoroughly dried at 100 °C for 6 h under vacuum. ZIF-8 crystals (0.01 g) were mixed with 10 mL of an aqueous solution of methyl orange and rhodamine B (50 mg/L) and sonicated for 2 min, respectively. Each solution was stirred at 500 rpm for 2 h. After dye adsorption, the supernatant was acquired by centrifugation (8000 rpm, 10 min) and measured using a Genesis 10S UV–Vis spectrophotometer.

#### **Section 4. Materials characterisation**

A FEI Tecnai 12 transmission electron microscope with a LaB6 emitter at 120 kV and S8000 field-emission scanning electron microscope (Tescan) were used for morphology analysis. A Nano ZS Malvern Zetasizer was used to measure dynamic light scattering (DLS). Powder X-ray diffraction was measured using a D8 Advanced A25 diffractometer (BRUKER). BET surface area was measured using a BELSORP-mini II (MicrotracBEL). Thermogravimetric analysis (TGA) was measured using a TGA Q50 (TA Instruments). A TruSpec Micro (LECO) was used for elemental analysis. Microemulsion density and diameter were estimated using a Sympatec particle size analyser (NANOPHOX). A Nikon optical microscope (ECLIPSE 80i) was used for in situ analysis of microemulsion. For cryogenic transmission electron microscopy, a reaction solution (3  $\mu$ L) was sampled on a holey carbon-coated gold grid (Quantifoil R 1/4, 300 Mesh, Gold) that was pre-treated for high hydrophilicity using a PELCO easiGlow™. Sample vitrification was performed using a semi-automated vitrification robot (Vitrobot Mark IV, Thermo Scientific) with 100% humidity at 25 °C. Rapid immersion of the TEM grid into liquid ethane after 4 s blotting effectively vitrified the sample.

**Figures**

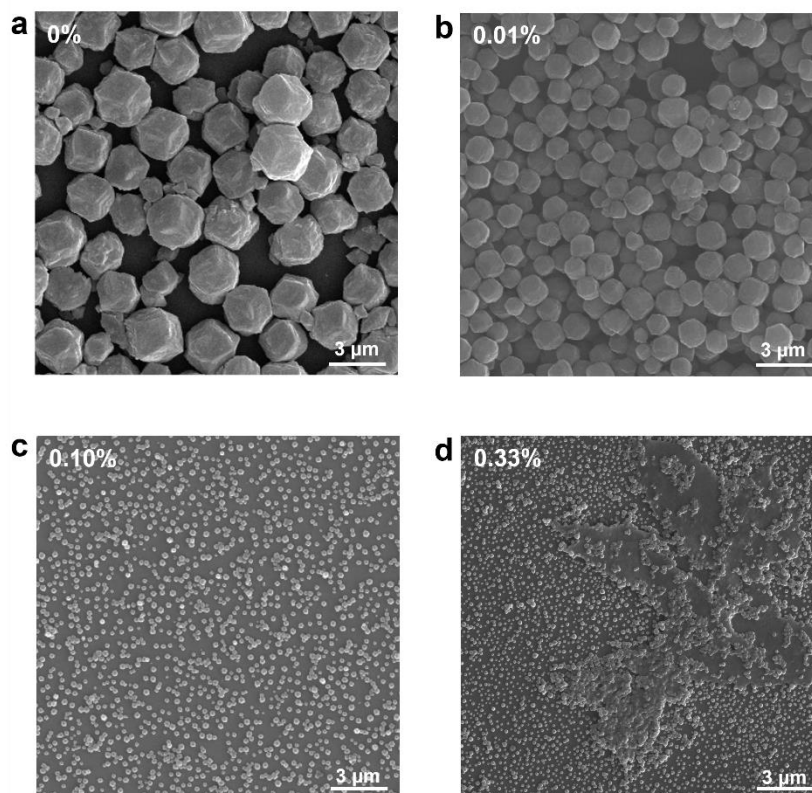

**Fig. S1** (a–d) Low-magnification SEM images of ZIF-8 crystals formed by the addition of microemulsion with different xylene volume ratios (a: 0%, b: 0.01%, c: 0.10% and d: 0.33%).

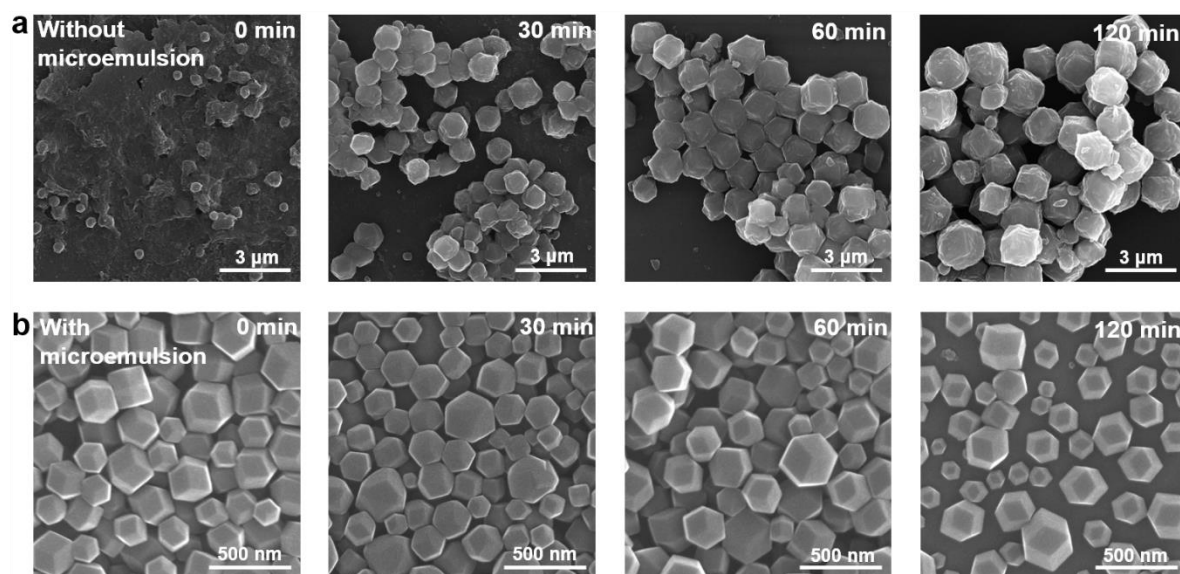

**Fig. S2** SEM images of ZIF-8 crystals formed (a) without microemulsion and (b) with microemulsion with 0.10% xylene. At each reaction time, the reaction was terminated and ZIF-8 crystals were collected after removing any remaining chemicals in solution. It is noted that 0 min of reaction was counted right after 5 min of the initial stirring was finished.

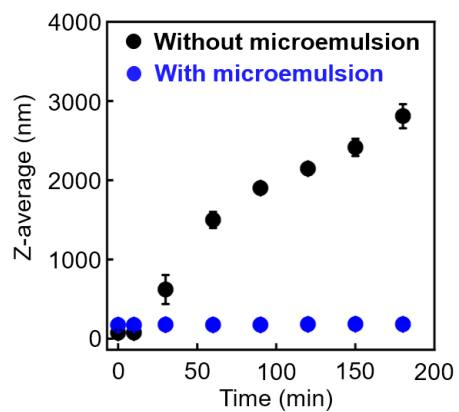

**Fig. S3** Size measurement of ZIF-8 crystals as a function of reaction time using DLS (blue circle: ZIF-8 crystals synthesised with 0.10% xylene-based microemulsion and black circle: ZIF-8 crystals synthesised without microemulsion).

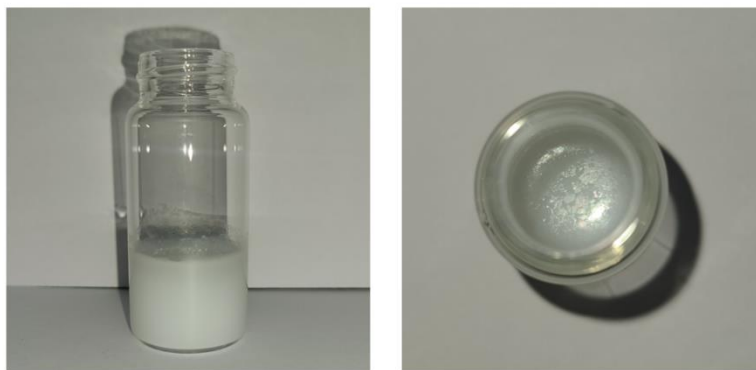

**Fig. S4** Photographs of as-synthesised ZIF-8 crystal solution with 0.10% xylene-based microemulsion right after the synthesis was terminated. For better visual aid, a scale-up reaction was performed (total volume: 6 mL).



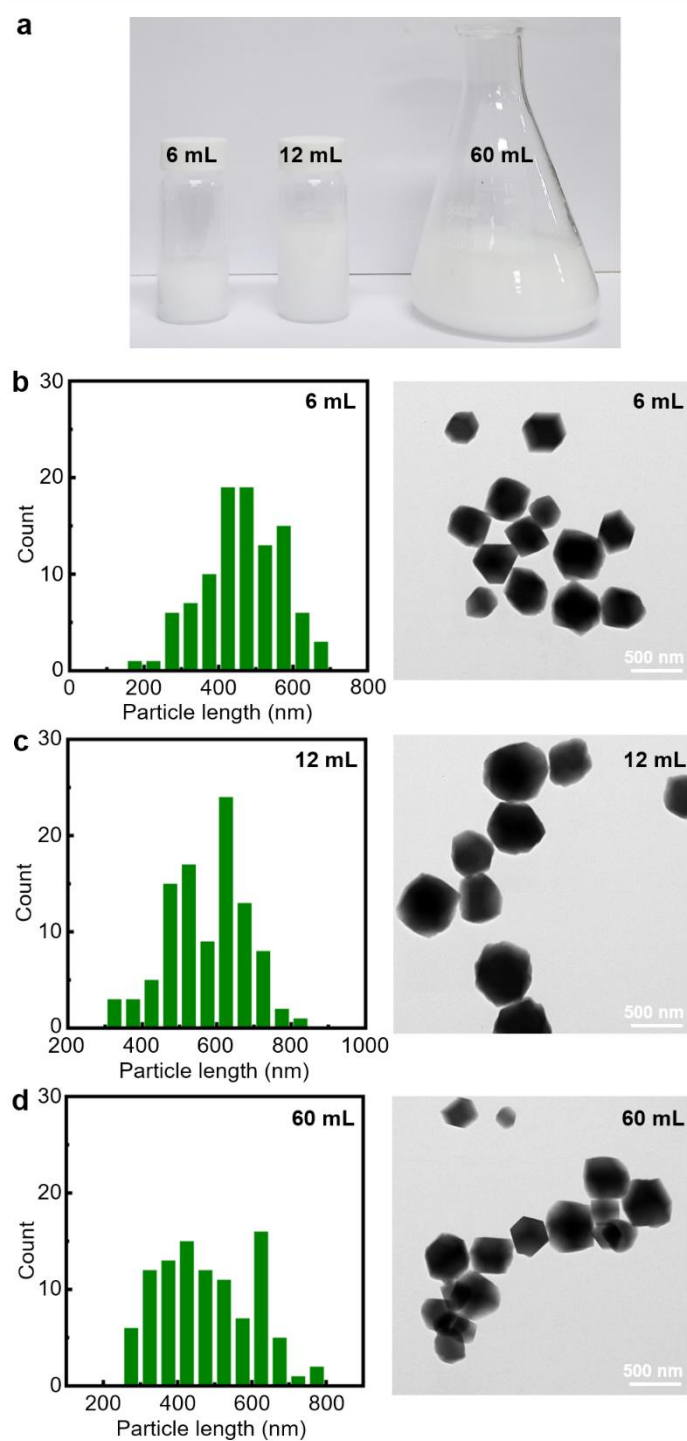

**Fig. S5** (a) Photographs of ZIF-8 crystal solution synthesised with 0.10% xylene-based microemulsion (from left to right: 6 mL volume scale, 12 mL volume scale and 60 mL volume scale). Length distribution histogram and representative TEM image of (b) 6 mL volume scale, (c) 12 mL volume scale and (d) 60 mL volume scale. Data were obtained by measuring 100 particles in each condition.

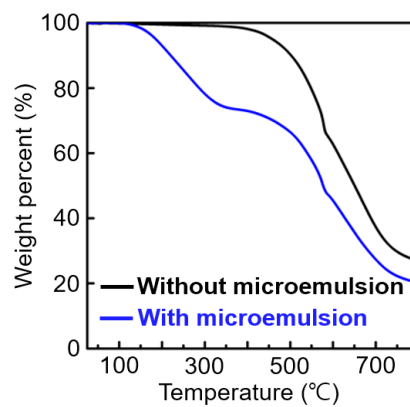

**Fig. S6** TGA of ZIF-8 crystals (blue curve: ZIF-8 crystals synthesised with 0.10% xylene-based microemulsion and black circle: ZIF-8 crystals synthesised without microemulsion). The temperature was raised from 25°C to 800°C by 10°C/min under nitrogen.

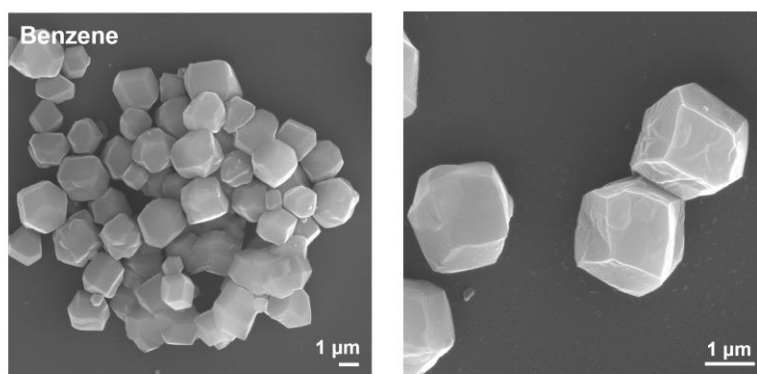

**Fig. S7** SEM images of ZIF-8 crystals formed by the addition of 0.10% benzene-based microemulsion.

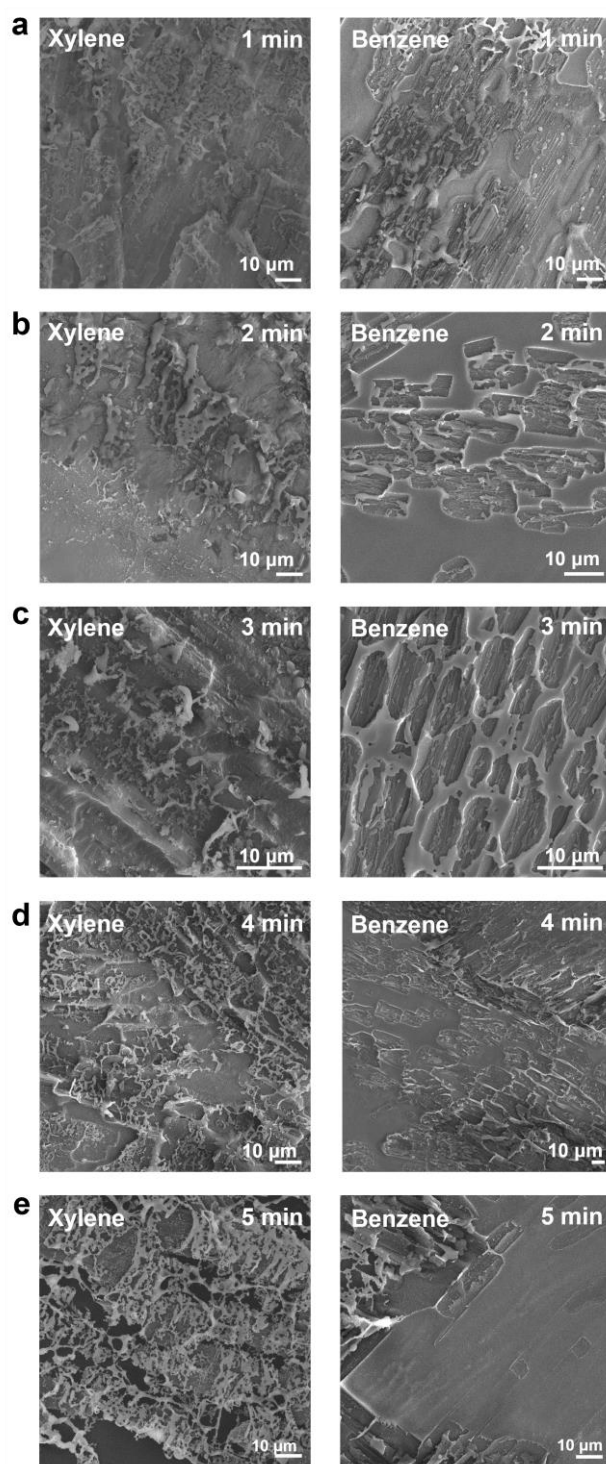

**Fig. S8** (a–e) Ex situ SEM images of ZIF-8 crystals captured at different reaction times by 0.10% xylene-based microemulsion (left) and 0.10% benzene-based microemulsion (right).

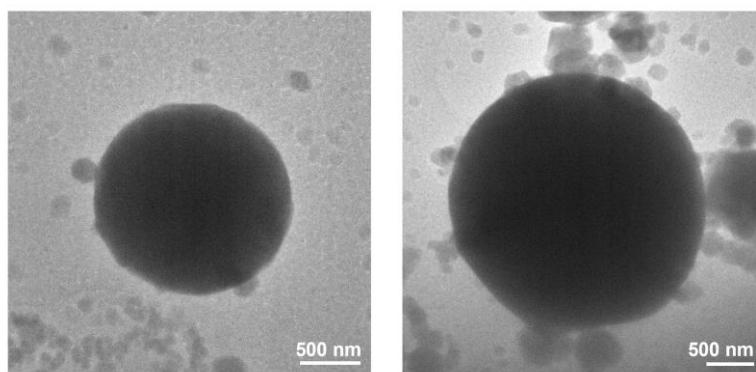

**Fig. S9** Cryo-TEM images of a reaction medium frozen at the very early stage of ZIF-8 formation by the addition of 0.10% xylene-based microemulsion.

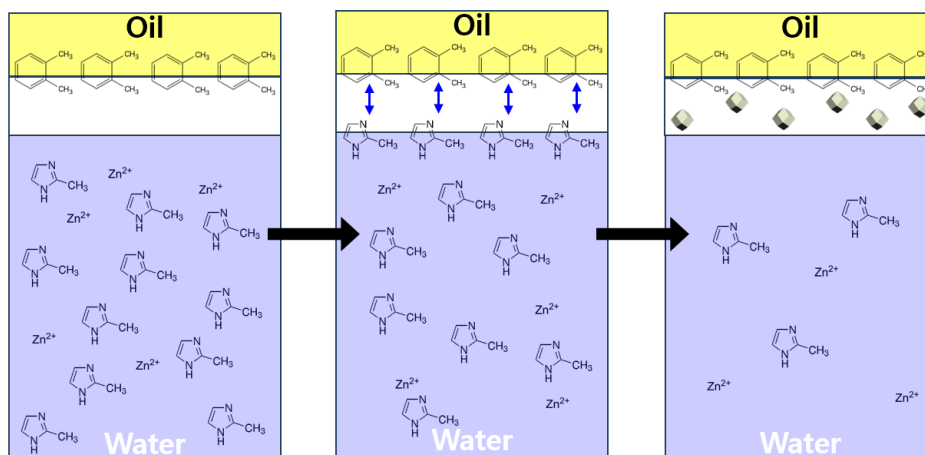

**Fig. S10** A schematic for microemulsion-mediated formation of ZIF-8 crystals. At the interface between the microemulsion and bulk solution, the local concentration of 2-methylimidazole could be increased, which accelerated the formation of ZIF-8 crystals.

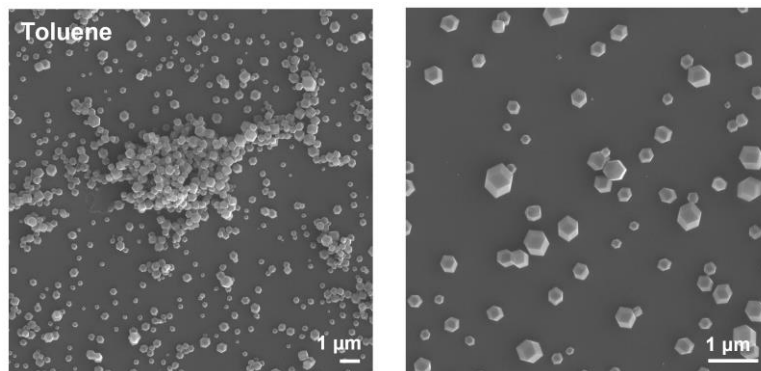

**Fig. S11** SEM images of ZIF-8 crystals formed by the addition of 0.10% toluene-based microemulsion.

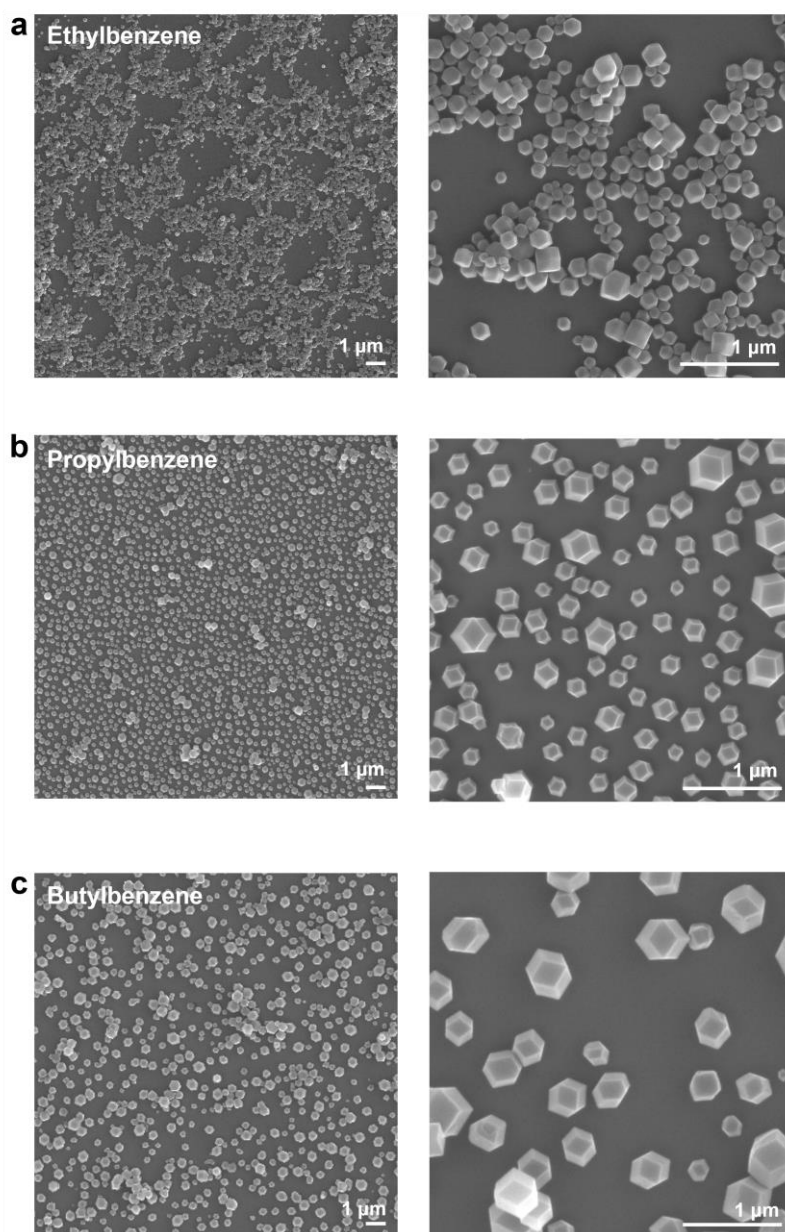

**Fig. S12** SEM images of ZIF-8 crystals formed by the addition of (a) 0.10% ethylbenzene-based microemulsion, (b) 0.10% propylbenzene-based microemulsion and (c) 0.10% butylbenzene-based microemulsion.



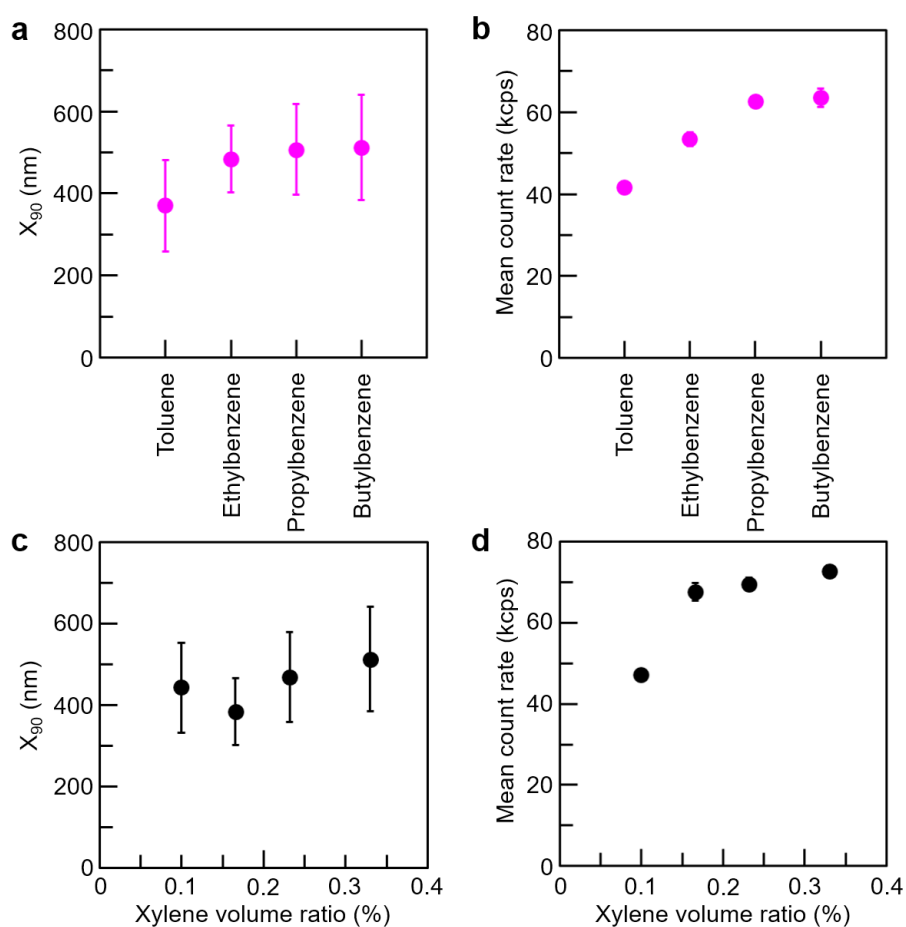

**Fig. S13** (a) Oil-in-water microemulsion diameter generated by different oil phases (from left to right: toluene, ethylbenzene, propylbenzene and butylbenzene). (b) Oil-in-water microemulsion density generated by different oil phases (from left to right: toluene, ethylbenzene, propylbenzene and butylbenzene). (c) Oil-in-water microemulsion diameter generated by different xylene volume ratios (from left to right: 0.10%, 0.17%, 0.23% and 0.33%). (d) Oil-in-water microemulsion density generated by different xylene volume ratios (from left to right: 0.10%, 0.17%, 0.23% and 0.33%).

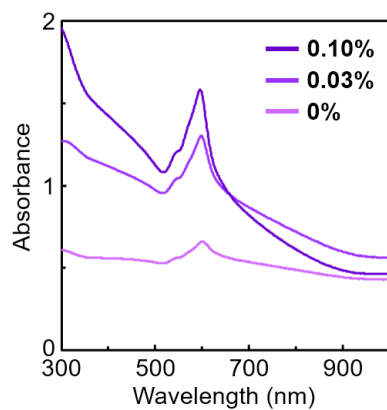

**Fig. S14** UV-visible absorption spectra of ZIF-67 crystals formed by the addition of microemulsion with different xylene volume ratios (dark purple: 0.10%, purple: 0.03% and light purple: 0%).

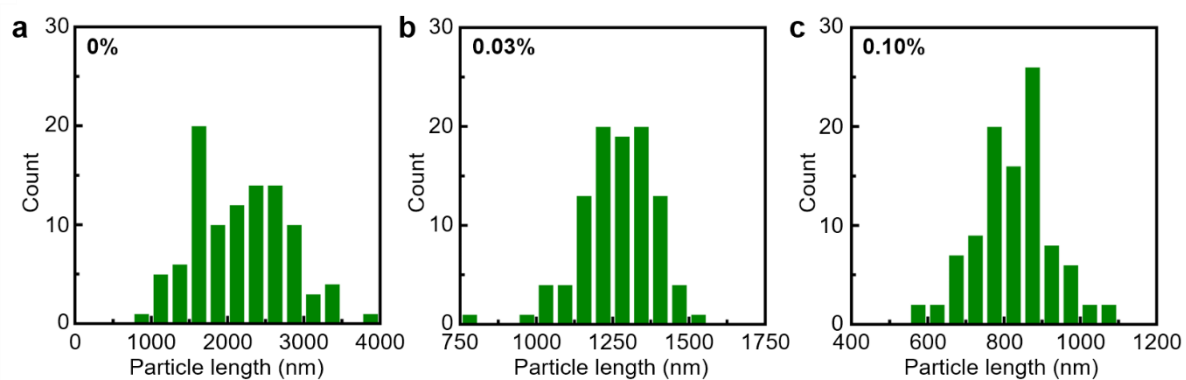

**Fig. S15** (a–c) Length distribution histograms for ZIF-67 crystals formed by the addition of microemulsion with different xylene volume ratios (a: 0%, b: 0.03% and c: 0.10%). Data were obtained by measuring 100 particles in each condition.

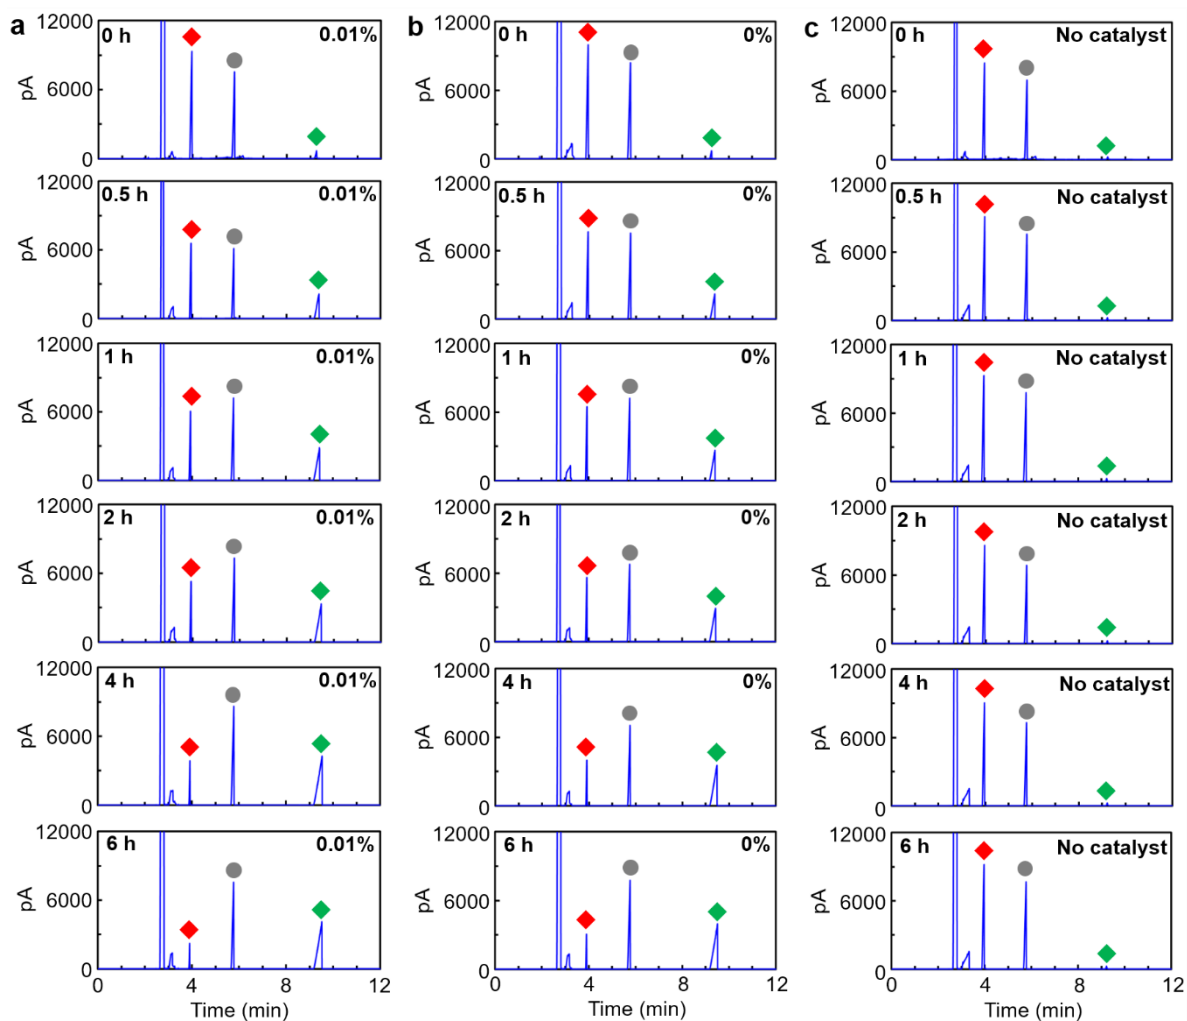

**Fig. S16** (a–c) GC spectra of product species collected at different reaction times for Knoevenagel condensation of malononitrile with benzaldehyde using (a) ZIF-8 nanocrystals generated by 0.10% xylene-based microemulsion (a), ZIF-8 microcrystals (b) and no catalyst (c), where peaks were assigned as red rhombus for benzaldehyde, gray circle for dodecane and green rhombus for benzalmalononitrile.

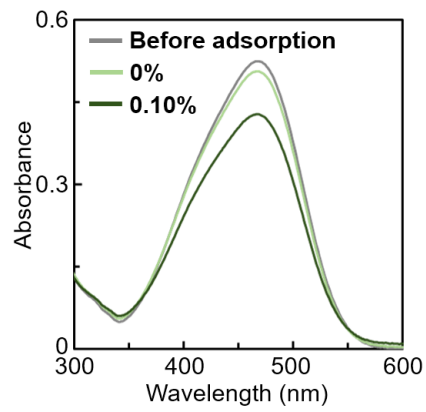

**Fig. S17** UV-visible spectra of 50 mg/L methyl orange solution with 0.01 g of ZIF-8 crystals (gray profile: before adding ZIF-8 crystals, light green profile: after adding ZIF-8 microcrystals and dark green profile: ZIF-8 nanocrystals generated by 0.10% xylene-based microemulsion). Each supernatant was measured after diluted 5 times.

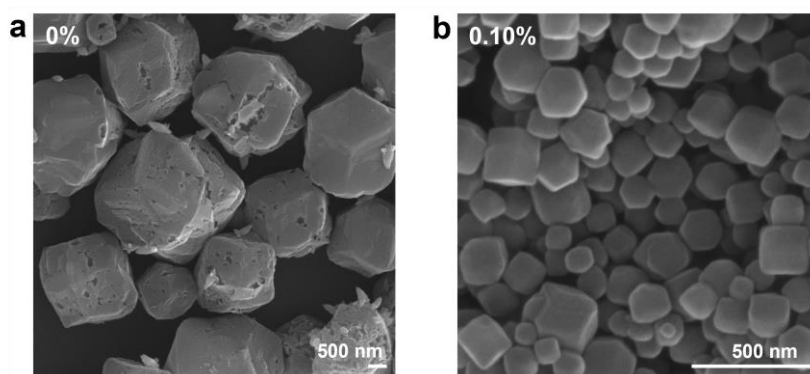

**Fig. S18** SEM images of (a) ZIF-8 microcrystals and (b) ZIF-8 nanocrystals generated by 0.10% xylene-based microemulsion after methyl orange adsorption.

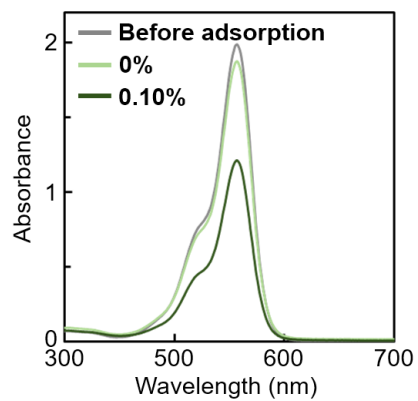

**Fig. S19** UV-visible spectra of 50 mg/L rhodamine B solution with 0.01 g of ZIF-8 crystals (gray profile: before adding ZIF-8 crystals, light green profile: after adding ZIF-8 microcrystals and dark green profile: ZIF-8 nanocrystals generated by 0.10% xylene-based microemulsion. Each supernatant was measured after diluted 5 times.

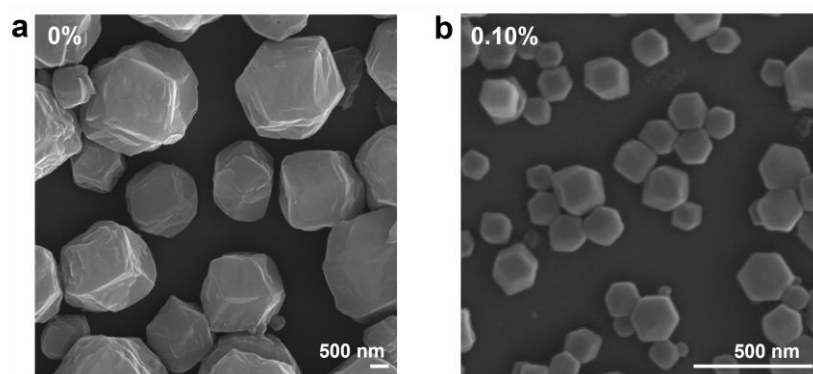

**Fig. S20** SEM images of (a) ZIF-8 microcrystals and (b) ZIF-8 nanocrystals generated by 0.10% xylene-based microemulsion after rhodamine B adsorption.



**Table S1.** Porous structure analysis of ZIF-8 crystals by different volume ratios.

| Xylene (%) | BET surface area (m <sup>2</sup> /g) | Total pore volume (cm <sup>3</sup> /g) |
|------------|--------------------------------------|----------------------------------------|
| 0          | 1212                                 | 0.6694                                 |
| 0.01       | 1257                                 | 0.6689                                 |
| 0.10       | 1279                                 | 1.2076                                 |
| 0.33       | 1298                                 | 1.1673                                 |

**Table S2.** Elemental analysis of ZIF-8 crystals by different volume ratios.

| Xylene (%) | N (%)  | C (%)  | H (%)  |
|------------|--------|--------|--------|
| 0          | 25.982 | 40.189 | 4.2539 |
| 0.10       | 18.196 | 54.453 | 6.6839 |

**Table S3.** Conversion rate for the Knoevenagel condensation reaction of malononitrile with benzaldehyde by ZIF-8 in recent work.

| Reference                                                               | Size (nm) | Conversion (%) |
|-------------------------------------------------------------------------|-----------|----------------|
| A. L. D. Ramos et al. <i>Appl. Catal. A: Gen.</i> <b>2017</b> , 548, 47 | 21        | 64 [2 h]       |
| X. Kong et al. <i>Appl. Surf. Sci.</i> <b>2017</b> , 423, 349           | 114       | 95 [3 h]       |
| D. Bradshaw et al. <i>J. Mater. Chem. A</i> <b>2018</b> , 6, 20473      | 120       | 77 [6 h]       |
| R. Schneider et al. <i>CrystEngComm</i> <b>2014</b> , 16, 4493          | 141 ± 48  | 99 [70 min]    |
| L. Rao et al. <i>ChemistrySelect</i> , <b>2019</b> , 4, 1188            | 100–200   | 88 [10 min]    |
| Our work                                                                | 272 ± 59  | 88 [4 h]       |
| W. Ahn et al. <i>Chem. Eng. J.</i> <b>2015</b> , 271, 276               | 300–400   | 98 [4 h]       |
| X. Kong et al. <i>Appl. Surf. Sci.</i> <b>2017</b> , 423, 349           | 468       | 65 [3 h]       |
| R. Schneider et al. <i>CrystEngComm</i> <b>2014</b> , 16, 4493          | 500       | 88 [70 min]    |

**Table S4.** Adsorption of methyl orange by ZIF-8 in recent work.

| Reference                                                                    | Size (nm) | Q <sub>e</sub> (mg/g) |
|------------------------------------------------------------------------------|-----------|-----------------------|
| A. Chiang et al. <i>Microporous Mesoporous Mater.</i> <b>2019</b> , 277, 149 | 50–100    | 10.1                  |
| Our work                                                                     | 272 ± 59  | 4.8                   |
| J. Yao et al. <i>Microporous Mesoporous Mater.</i> <b>2016</b> , 234, 287    | 500       | 1.8                   |
| J. Yao et al. <i>RSC Adv.</i> <b>2016</b> , 6, 109608                        | 500       | 18                    |

**Table S5.** Adsorption of rhodamine B by ZIF-8 in recent work.

| Reference                                                                    | Size (nm) | Q <sub>e</sub> (mg/g) |
|------------------------------------------------------------------------------|-----------|-----------------------|
| A. Chiang et al. <i>Microporous Mesoporous Mater.</i> <b>2019</b> , 277, 149 | 50–100    | 25.0                  |
| A. Rehman et al. <i>Surf. Interfaces.</i> <b>2022</b> , 34, 102324           | < 200     | 6.9                   |
| Our work                                                                     | 272 ± 59  | 10.0                  |
| J. Yao et al. <i>Microporous Mesoporous Mater.</i> <b>2016</b> , 234, 287    | 500       | 7.8                   |
| M. Nath et al. <i>ChemistrySelect</i> <b>2017</b> , 2, 7711                  | > 500     | 1.6                   |

**Movie S1.** Real-time recording of 0.10% xylene-induced microemulsion solution under dark.

**Movie S2.** Real-time recording of 0.10% benzene-induced microemulsion solution under dark.

**Movie S3.** Real-time recording of xylene-induced microemulsion solution with different volume ratio (from left to right: 0.10%, 0.33%, 1.00% and 3.33%).

## **References**

1. C. Bae, J. Lee, L. Yao, S. Park, Y. Lee, J. Lee, Q. Chen and J. Kim, *Nano Res.* 2021, **14**, 66-73.
2. J. Qian, F. Sun and L. Qin, *Mater. Lett.* 2012, **82**, 220-223.
3. X. Ge, C. Li, Z. Li and L. Yin, *Electrochim. Acta* 2018, **281**, 700-709.
